# Supplementary material
Source: PubMed Central journal article supplement (PMC6529209)
Supplement: NIHMS883433-supplement-1.pdf [file NIHMS883433-supplement-1.pdf]

## Supplemental Table

### References to Patient-reported Outcome Measures

**PHQ-9:** Kroenke K, Spitzer RL, Williams JB. The PHQ-9: validity of a brief depression severity measure. *J Gen Intern Med.* 2001;16:606-13.

**PROMIS:** Cella D, Yount S, Rothrock N, Gershon R, Cook K, Reeve B, et al. The Patient-Reported Outcomes Measurement Information System (PROMIS): progress of an NIH Roadmap cooperative group during its first two years. *Med Care.* 2007;45:S3-S11.

**WOMAC:** Bellamy N, Buchanan WW, Goldsmith CH. Validation study of WOMAC: A health status instrument for measuring clinically important patient relevant outcomes to antirheumatic drug therapy in patients with osteoarthritis of the hip or knee. *Journal of Rheumatology.* 1988;15:1833-40.

**Roland-Morris Disability Questionnaire:** Roland M, Fairbank J. The Roland-Morris Disability Questionnaire and the Oswestry Disability Questionnaire. *Spine (Phila Pa 1976).* 2000;25:3115-24.

**Oswestry Disability Questionnaire:** Fairbank JC, Pynsent PB. The Oswestry Disability Index. *Spine (Phila Pa 1976).* 2000;25:2940-52

**RAPID3:** Pincus T, Strand V, Koch G, Amara I, Crawford B, Wolfe F, et al. An index of the three core data set patient questionnaire measures distinguishes efficacy of active treatment from that of placebo as effectively as the American College of Rheumatology 20% response criteria (ACR20) or the Disease Activity Score (DAS) in a rheumatoid arthritis clinical trial. *Arthritis Rheum.* 2003;48:625-30.

**World Health Organization. International Classification of Functioning, Disability and Health:** ICF: World Health Organization; 2001.

**WHODASII:** World Health Organization. WHO Disability Assessment Schedule 2.0 (WHODAS 2.0). Geneva, Switzerland: World Health Organization; 2014.

**RA Patient Priorities for Pharmacologic Interventions Questionnaire:** Sanderson T, Morris M, Calnan M, Richards P, Hewlett S. Patient perspective of measuring treatment efficacy: the rheumatoid arthritis patient priorities for pharmacologic interventions outcomes. *Arthritis Care & Research.* 2010;62:647-56.

**Wheelchair Outcomes Measures WHOM:** Mortenson WB, Miller WC, Miller-Pogar J. Measuring wheelchair intervention outcomes: development of the wheelchair outcome measure. *Disability and Rehabilitation Assistive technology.* 2007;2:275-85.

**STarT Back.** Hill JC, Whitehurst DGT, Lewis M, Bryan S, Dunn KM, Foster NE, et al. Comparison of stratified primary care management for low back pain with current best practice (STarT Back): a randomised controlled trial. *Lancet.* 2011;378:1560-71.

**EOTRC QLQ-C30:** Aaronson NK, Ahmedzai S, Bergman B, Bullinger M, Cull A, Duez NJ, et al. The European Organization for Research and Treatment of Cancer QLQ-C30: a quality-of-life instrument for use in international clinical trials in oncology. *Journal of the National Cancer Institute.* 1993;85:365-76.

**Back Pain Screening Tool for Primary Care.** Hill JC, Dunn KM, Lewis M, Mullis R, Main CJ, Foster NE, et al. A primary care back pain screening tool: identifying patient subgroups for initial treatment. *Arthritis Rheum.* 2008;59:632-41.
